# Supplementary material
Source: PubMed Central journal article supplement (PMC3403411)
Supplement: pro0021-0743-SD1.pdf [file pro0021-0743-SD1.pdf]

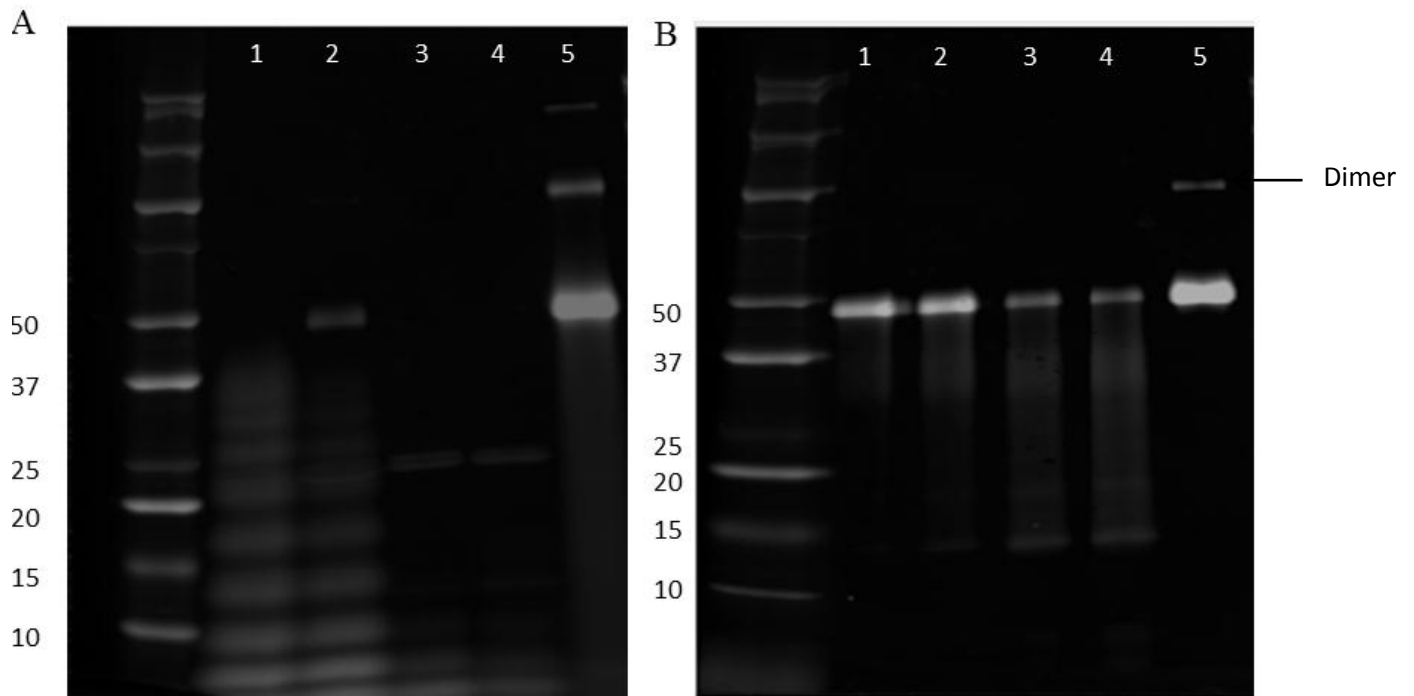

**Supplementary Figure 1.** SDS-PAGE image depicting degradation of CFSE labeled S96 by elastase and collagenase **A)** Representative gel for S96 incubated with elastase for 2hrs: Lane 1: 0.35 units at 20 °C; 2: 0.7 units at 20 °C; 3: 0.35 units at 37 °C; 4: 0.7 units at 37°C; 5: control. **B)** Representative gel for S96 incubated with collagenase for 2 hrs: Lane 1: 3.6 units at 37 °C; 2: 6.0 units at 37 °C; 3: 3.6 units at 20 °C; 4: 6.0 units at 20 °C; 5: control.

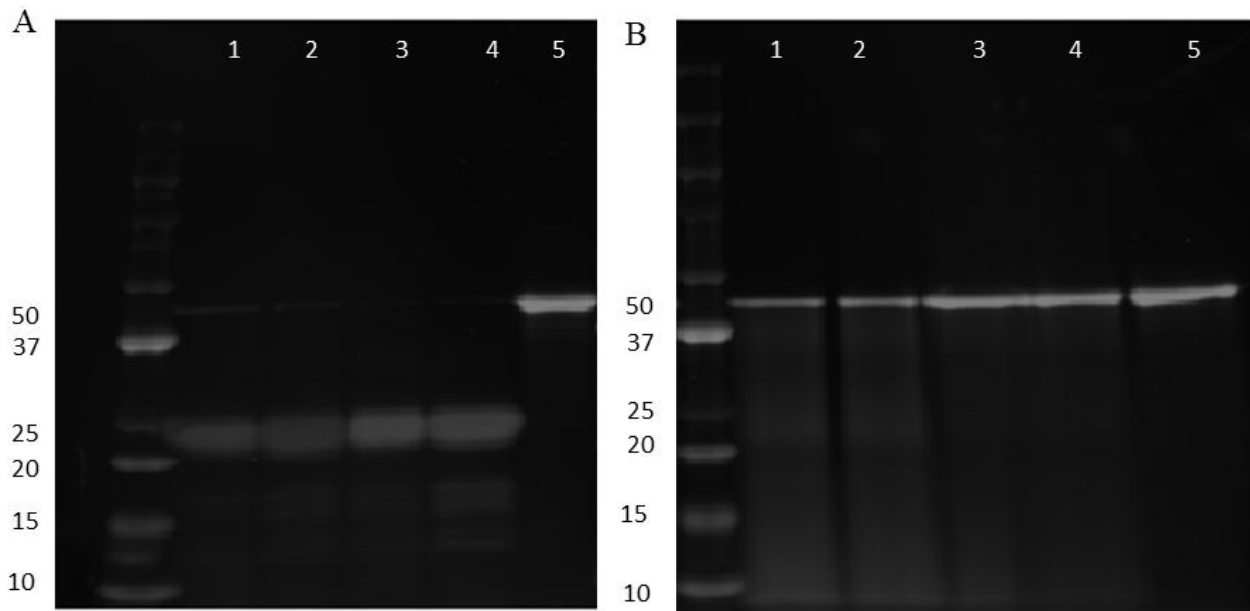

**Supplementary Figure 2.** SDS-PAGE image depicting degradation of CFSE labeled I96 by elastase and collagenase **A)** Representative gel for I96 incubated with elastase for 2hrs: Lane 1: 0.35 units at 4 °C; 2: 0.7 units at 4 °C; 3: 0.35 units at 37 °C; 4: 0.7 units at 37°C; 5: control. **B)** Representative gel for I96 incubated with collagenase for 2 hrs: Lane 1: 3.6 units at 4 °C; 2: 6.0 units at 4 °C; 3: 3.6 units at 37 °C; 4: 6.0 units at 37 °C; 5: control.

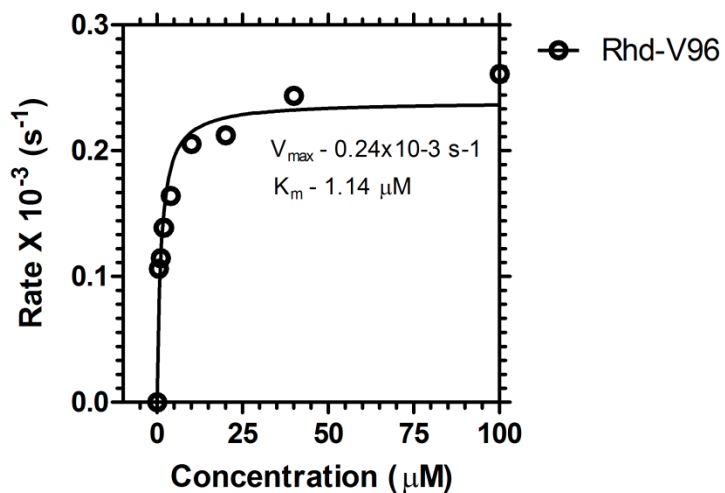

**Supplementary Figure 3.** Michaelis-Menten enzyme kinetics for proteolysis of rhodamine labeled V96. ELPs were incubated at 40 °C, which is above the phase transition temperature in the presence of 2.5 units/mL elastase. Based on the kinetic studies using PAGE, we used image analysis to calculate the rate order,  $V_{\max}$  ( $0.24 \times 10^{-3} \text{ s}^{-1}$ ) and degradation constant,  $K_m$  ( $1.14 \mu\text{M}$ ) after digesting various concentrations of Rhd-V96 for periods from 5 to 40 mins.
